# Supplementary material for: Year-to-year trajectories of hospital utilisation rates among patients with COPD: a real-world, single-centre, retrospective cohort study
Source: HighWire-hosted journal article supplement (doi:10.1136/bmjopen-2023-072571), 2023-09-01

Year-to-year trajectories of hospital utilisation rates among patients with COPD: a retrospective cohort study

Supplemental table S1 Variables included in the CGH COPD database warehouse

| Variable                                       | Description                                      |
|------------------------------------------------|--------------------------------------------------|
| Demographics                                   | Age                                              |
|                                                | Sex                                              |
|                                                | Ethnicity                                        |
|                                                | Height                                           |
|                                                | Weight                                           |
| Comorbidities                                  | All comorbidities including, but not limited to: |
|                                                | Myocardial infarction                            |
|                                                | Congestive heart failure                         |
|                                                | Peripheral vascular disease                      |
|                                                | Cerebrovascular disease                          |
|                                                | Hemiplegia or paraplegia                         |
|                                                | Dementia                                         |
|                                                | Chronic pulmonary disease                        |
|                                                | Rheumatologic disease                            |
|                                                | Peptic ulcer disease                             |
|                                                | Diabetes (with or without complications)         |
|                                                | Renal disease                                    |
|                                                | Malignancy                                       |
|                                                | Metastatic solid tumour                          |
|                                                | Liver disease (mild, moderate or severe)         |
|                                                | Acquired immune deficiency syndrome              |
|                                                | Hypertension                                     |
|                                                | Dyslipidaemia                                    |
|                                                | Asthma                                           |
|                                                | Gastroesophageal reflux disease                  |
|                                                | Depression                                       |
|                                                | Anxiety                                          |
| COPD classification (grading or ABCD grouping) | FEV <sub>1</sub>                                 |
|                                                | CAT score                                        |
|                                                | Exacerbations leading to hospitalisation         |
| Smoking status                                 | Ex-smoker                                        |
|                                                | Current smoker                                   |
|                                                | Never-smoker                                     |

| Variable                                       | Description                                                                                                                                                                           |
|------------------------------------------------|---------------------------------------------------------------------------------------------------------------------------------------------------------------------------------------|
|                                                | Pack-year history                                                                                                                                                                     |
| Vaccines                                       | Pneumococcal (PCV13 or PPSV23) vaccinations                                                                                                                                           |
|                                                | Influenza vaccinations                                                                                                                                                                |
| Investigations                                 | Laboratory results, including full blood count (eg, eosinophils), C-reactive protein, procalcitonin and arterial blood gases                                                          |
|                                                | Microbiology results, including sputum gram stain and culture, tuberculosis smear and culture                                                                                         |
|                                                | Lung function tests, including pre- and post-bronchodilator spirometry (FEV <sub>1</sub> /FVC ratio), diffusion capacity, lung volumes, 6-minute walk test, exhaled nitric oxide test |
|                                                | Radiology, including chest x-ray and computed tomography                                                                                                                              |
|                                                | 2D echocardiography, including left ventricular ejection fraction and pulmonary hypertension echocardiography                                                                         |
| Patient-reported outcomes                      | CAT score                                                                                                                                                                             |
| Medications (only within CGH)                  | Quantity of medications prescribed and quantity of medications dispensed within CGH                                                                                                   |
|                                                | All medications including, but not limited to (including combinations of):                                                                                                            |
|                                                | SABA                                                                                                                                                                                  |
|                                                | SAMA                                                                                                                                                                                  |
|                                                | LABA                                                                                                                                                                                  |
|                                                | LAMA                                                                                                                                                                                  |
|                                                | ICS                                                                                                                                                                                   |
|                                                | Methylxanthine (eg, theophylline)                                                                                                                                                     |
|                                                | Phosphodiesterase type 4 inhibitor (eg, roflumilast)                                                                                                                                  |
|                                                | Antibiotics (eg, penicillins, fluoroquinolones, macrolides, tetracycline)                                                                                                             |
|                                                | Beta-blockers                                                                                                                                                                         |
|                                                | Diuretics                                                                                                                                                                             |
|                                                | Antiplatelets and angiotensin-converting enzyme inhibitors                                                                                                                            |
| Mortality                                      | Date of death                                                                                                                                                                         |
| Hospital encounters, including dates and times | ED visits                                                                                                                                                                             |
|                                                | All-cause and COPD-related admissions                                                                                                                                                 |
|                                                | Mechanical ventilation (invasive and non-invasive)                                                                                                                                    |
|                                                | Diagnostic codes                                                                                                                                                                      |
|                                                | Outpatient visits                                                                                                                                                                     |

| Variable | Description                                                                                                                                                                                                                                                                                                                                                                                                                                                      |
|----------|------------------------------------------------------------------------------------------------------------------------------------------------------------------------------------------------------------------------------------------------------------------------------------------------------------------------------------------------------------------------------------------------------------------------------------------------------------------|
|          | Severity of exacerbation (ICU/mechanical ventilation or not)                                                                                                                                                                                                                                                                                                                                                                                                     |
|          | 2D, two-dimensional; CAT, COPD Assessment Test; CGH, Changi General Hospital; COPD, chronic obstructive pulmonary disease; ED, emergency department; FEV <sub>1</sub> , forced expiratory volume in 1 second; FVC, forced vital capacity; ICS, inhaled corticosteroid; ICU, intensive care unit; LABA, long-acting $\beta_2$ -agonist; LAMA, long-acting muscarinic antagonist; SABA, short-acting $\beta_2$ -agonist; SAMA, short-acting muscarinic antagonist. |

**Supplemental table S2** Patient baseline characteristics

|                                                  | <b>Total (N=396)</b> | <b>Analysis of COPD-related hospitalisations/ED visits (n=394)</b> | <b>Analysis of all-cause hospitalisations/ED visits (n=389)</b> |
|--------------------------------------------------|----------------------|--------------------------------------------------------------------|-----------------------------------------------------------------|
| Age, years, median (IQR)                         | 70 (60–79)           | 70 (61–79)                                                         | 70 (61–79)                                                      |
| Male, n (%)                                      | 346 (87.4)           | 344 (87.3)                                                         | 339 (87.1)                                                      |
| Ethnicity, n (%)                                 |                      |                                                                    |                                                                 |
| Chinese                                          | 218 (55.1)           | 218 (55.3)                                                         | 215 (55.3)                                                      |
| Malay                                            | 95 (24.0)            | 94 (23.9)                                                          | 92 (23.7)                                                       |
| Indian                                           | 36 (9.1)             | 36 (9.1)                                                           | 36 (9.3)                                                        |
| Other                                            | 47 (11.9)            | 46 (11.7)                                                          | 46 (11.8)                                                       |
| Smoking history, n (%)                           |                      |                                                                    |                                                                 |
| Current smoker                                   | 162 (40.9)           | 161 (40.9)                                                         | 158 (40.6)                                                      |
| Ex-smoker                                        | 159 (40.2)           | 158 (40.1)                                                         | 156 (40.1)                                                      |
| Never-smoker                                     | 40 (10.1)            | 40 (10.2)                                                          | 40 (10.3)                                                       |
| Unknown                                          | 35 (8.8)             | 35 (8.8)                                                           | 35 (9.0)                                                        |
| Body mass index, kg/m <sup>2</sup>               |                      |                                                                    |                                                                 |
| Median (IQR)                                     | 23.4 (19.5–27.4)     | 23.4 (19.5–27.3)                                                   | 23.4 (19.5–27.4)                                                |
| Unknown, n (%)                                   | 141 (36.2)           | 142 (36.0)                                                         | 141 (36.2)                                                      |
| CAT score                                        |                      |                                                                    |                                                                 |
| Median (IQR)                                     | 14 (9–19)            | 14 (9–19)                                                          | 14 (9–20)                                                       |
| Unknown, n (%)                                   | 258 (65.4)           | 258 (65.4)                                                         | 255 (65.6)                                                      |
| Lung function test, median (IQR)                 |                      |                                                                    |                                                                 |
| Post-bronchodilator FEV <sub>1</sub> (L)         | 1.52 (1.12–2.00)     | 1.53 (1.12–2.00)                                                   | 1.53 (1.12–2.01)                                                |
| Post-bronchodilator FEV <sub>1</sub> % predicted | 70 (54–84)           | 70 (54–84)                                                         | 70 (55–84)                                                      |
| GOLD grade, n (%)                                |                      |                                                                    |                                                                 |

|                                                 |               |               |               |
|-------------------------------------------------|---------------|---------------|---------------|
| GOLD grade 1 (≥80%)                             | 86 (21.7)     | 86 (21.8)     | 85 (21.9)     |
| GOLD grade 2 (50–79%)                           | 153 (38.6)    | 152 (38.6)    | 152 (39.1)    |
| GOLD grade 3 (30–49%)                           | 3 (13.6)      | 53 (13.5)     | 52 (13.4)     |
| GOLD grade 4 (<30%)                             | 3 (0.8)       | 3 (0.8)       | 1 (0.3)       |
| Unknown                                         | 100 (25.3)    | 100 (25.3)    | 99 (25.4)     |
| Blood eosinophil count (cells/μl), median (IQR) |               |               |               |
| Median (IQR)                                    | 200 (100–400) | 200 (100–400) | 200 (100–400) |
| Unknown, n (%)                                  | 77 (19.4)     | 76 (19.3)     | 76 (19.3)     |
| Elixhauser comorbidity score, median (IQR)      | 8 (3–17)      | 8 (3–17)      | 8 (3–18)      |
| Comorbidities, n (%)                            |               |               |               |
| Hypertension                                    | 201 (50.8)    | 200 (50.8)    | 196 (50.4)    |
| Ischaemic heart disease                         | 163 (41.2)    | 162 (41.1)    | 159 (40.9)    |
| Hyperlipidaemia                                 | 135 (34.1)    | 135 (34.3)    | 132 (33.9)    |
| Diabetes                                        | 129 (32.6)    | 129 (32.7)    | 126 (32.4)    |
| Chronic kidney disease                          | 80 (20.2)     | 80 (20.3)     | 78 (20.1)     |
| Atrial fibrillation/arrhythmias                 | 77 (19.4)     | 76 (19.3)     | 75 (19.3)     |
| Asthma                                          | 73 (18.4)     | 71 (18.0)     | 71 (18.3)     |
| Heart failure                                   | 64 (16.2)     | 64 (16.2)     | 63 (16.2)     |
| Bronchiectasis                                  | 32 (8.1)      | 31 (7.9)      | 30 (7.7)      |
| Anxiety/depression                              | 26 (6.6)      | 24 (6.1)      | 15 (3.9)      |
| Obstructive sleep apnoea                        | 23 (5.8)      | 23 (5.8)      | 23 (5.9)      |
| Stroke/transient ischaemic attack               | 3 (0.8)       | 3 (0.8)       | 3 (0.8)       |
| Pulmonary tuberculosis                          | 2 (0.5)       | 2 (0.5)       | 2 (0.5)       |
| Moderate-to-severe COPD exacerbations in year 1 |               |               |               |

|                                                                                                                                                                                                                                                    |         |         |         |
|----------------------------------------------------------------------------------------------------------------------------------------------------------------------------------------------------------------------------------------------------|---------|---------|---------|
| Average, per person per year                                                                                                                                                                                                                       | 0.99    | 0.88    | 0.86    |
| Median (IQR)                                                                                                                                                                                                                                       | 0 (0–1) | 0 (0–1) | 0 (0–1) |
| All-cause hospitalizations/ED visits during baseline                                                                                                                                                                                               |         |         |         |
| Average, per person per year                                                                                                                                                                                                                       | 3.07    | 2.94    | 2.71    |
| Median (IQR)                                                                                                                                                                                                                                       | 2 (1–4) | 2 (1–4) | 2 (1–4) |
| CAT, COPD Assessment Test; COPD, chronic obstructive pulmonary disease; ED, emergency department; FEV <sub>1</sub> , forced expiratory volume in 1 second; GOLD, Global Initiative for Chronic Obstructive Lung Disease; IQR, interquartile range. |         |         |         |

**Supplemental table S3** Patient baseline characteristics of excluded patients

|                                                  | <b>Patients who died<br/>during the study<br/>period<br/>(n=475)</b> | <b>Patients who were<br/>excluded due to<br/>zero visits in any<br/>one of the study<br/>years<br/>(n=735)</b> |
|--------------------------------------------------|----------------------------------------------------------------------|----------------------------------------------------------------------------------------------------------------|
| Age, years, median (IQR)                         | 78 (70–84)                                                           | 70 (62–79)                                                                                                     |
| Male, n (%)                                      | 425 (89.5)                                                           | 644 (87.6)                                                                                                     |
| Ethnicity, n (%)                                 |                                                                      |                                                                                                                |
| Chinese                                          | 329 (69.3)                                                           | 432 (58.8)                                                                                                     |
| Malay                                            | 85 (17.9)                                                            | 166 (22.6)                                                                                                     |
| Indian                                           | 25 (5.3)                                                             | 57 (7.8)                                                                                                       |
| Other                                            | 36 (7.5)                                                             | 80 (10.8)                                                                                                      |
| Smoking history, n (%)                           |                                                                      |                                                                                                                |
| Current smoker                                   | 138 (29.1)                                                           | 266 (36.2)                                                                                                     |
| Ex-smoker                                        | 224 (47.2)                                                           | 260 (35.4)                                                                                                     |
| Never-smoker                                     | 28 (5.9)                                                             | 44 (6.0)                                                                                                       |
| Unknown                                          | 85 (17.8)                                                            | 165 (22.4)                                                                                                     |
| Body mass index, kg/m <sup>2</sup>               |                                                                      |                                                                                                                |
| Median (IQR)                                     | 20.1 (17.4–24.2)                                                     | 22.2 (19.1–25.6)                                                                                               |
| Unknown, n (%)                                   | 224 (47.1)                                                           | 457 (62.2)                                                                                                     |
| CAT score                                        |                                                                      |                                                                                                                |
| Median (IQR)                                     | 16 (11–20)                                                           | 12 (8–16)                                                                                                      |
| Unknown, n (%)                                   | 335 (70.5)                                                           | 593 (80.6)                                                                                                     |
| Lung function test, median (IQR)                 |                                                                      |                                                                                                                |
| Post-bronchodilator FEV <sub>1</sub> (L)         | 1.29 (0.96–1.73)                                                     | 1.53 (1.15–1.99)                                                                                               |
| Post-bronchodilator FEV <sub>1</sub> % predicted | 64 (48–84)                                                           | 72 (56–88)                                                                                                     |
| GOLD grade, n (%)                                |                                                                      |                                                                                                                |
| GOLD grade 1 (≥80%)                              | 66 (13.9)                                                            | 158 (21.5)                                                                                                     |
| GOLD grade 2 (50–79%)                            | 100 (21.1)                                                           | 171 (23.3)                                                                                                     |
| GOLD grade 3 (30–49%)                            | 53 (11.2)                                                            | 59 (8.0)                                                                                                       |
| GOLD grade 4 (<30%)                              | 11 (2.3)                                                             | 10 (1.4)                                                                                                       |
| Unknown                                          | 245 (51.6)                                                           | 337 (45.9)                                                                                                     |
| Blood eosinophil count (cells/μl), median (IQR)  |                                                                      |                                                                                                                |
| Median (IQR)                                     | 100 (0–237)                                                          | 150 (5–325)                                                                                                    |
| Unknown, n (%)                                   | 131 (27.6)                                                           | 386 (52.5)                                                                                                     |
| Elixhauser comorbidity score, median (IQR)       | 14 (8–24)                                                            | 3 (3–9)                                                                                                        |

|                                                                                                                                                                                                                                                    | <b>Patients who died<br/>during the study<br/>period<br/>(n=475)</b> | <b>Patients who were<br/>excluded due to<br/>zero visits in any<br/>one of the study<br/>years<br/>(n=735)</b> |
|----------------------------------------------------------------------------------------------------------------------------------------------------------------------------------------------------------------------------------------------------|----------------------------------------------------------------------|----------------------------------------------------------------------------------------------------------------|
| Comorbidities, n (%)                                                                                                                                                                                                                               |                                                                      |                                                                                                                |
| Hypertension                                                                                                                                                                                                                                       | 233 (50.9)                                                           | 236 (32.1)                                                                                                     |
| Ischaemic heart disease                                                                                                                                                                                                                            | 217 (45.7)                                                           | 165 (22.4)                                                                                                     |
| Hyperlipidaemia                                                                                                                                                                                                                                    | 114 (24.0)                                                           | 136 (18.5)                                                                                                     |
| Diabetes                                                                                                                                                                                                                                           | 130 (27.4)                                                           | 136 (18.5)                                                                                                     |
| Chronic kidney disease                                                                                                                                                                                                                             | 130 (27.4)                                                           | 77 (10.5)                                                                                                      |
| Atrial fibrillation/arrhythmias                                                                                                                                                                                                                    | 112 (23.6)                                                           | 66 (9.0)                                                                                                       |
| Asthma                                                                                                                                                                                                                                             | 15 (3.2)                                                             | 68 (9.3)                                                                                                       |
| Heart failure                                                                                                                                                                                                                                      | 122 (25.7)                                                           | 77 (10.5)                                                                                                      |
| Bronchiectasis                                                                                                                                                                                                                                     | 38 (8.0)                                                             | 30 (4.1)                                                                                                       |
| Anxiety/depression                                                                                                                                                                                                                                 | 28 (5.9)                                                             | 13 (1.8)                                                                                                       |
| Obstructive sleep apnoea                                                                                                                                                                                                                           | 7 (1.5)                                                              | 10 (1.4)                                                                                                       |
| Stroke/transient ischaemic attack                                                                                                                                                                                                                  | 1 (0.2)                                                              | 3 (0.4)                                                                                                        |
| Pulmonary tuberculosis                                                                                                                                                                                                                             | 11 (2.3)                                                             | 11 (1.5)                                                                                                       |
| Moderate-to-severe COPD exacerbations in year 1                                                                                                                                                                                                    |                                                                      |                                                                                                                |
| Average, per person                                                                                                                                                                                                                                | 0.88                                                                 | 0.40                                                                                                           |
| Median (IQR)                                                                                                                                                                                                                                       | 0 (0–1)                                                              | 0 (0–1)                                                                                                        |
| All-cause hospitalisation/ED visits during baseline                                                                                                                                                                                                |                                                                      |                                                                                                                |
| Average, per person                                                                                                                                                                                                                                | 2.52                                                                 | 1.14                                                                                                           |
| Median (IQR)                                                                                                                                                                                                                                       | 1 (1–3)                                                              | 1 (0–2)                                                                                                        |
| CAT, COPD Assessment Test; COPD, chronic obstructive pulmonary disease; ED, emergency department; FEV <sub>1</sub> , forced expiratory volume in 1 second; GOLD, Global Initiative for Chronic Obstructive Lung Disease; IQR, interquartile range. |                                                                      |                                                                                                                |

**Supplemental figure S1** Study design.

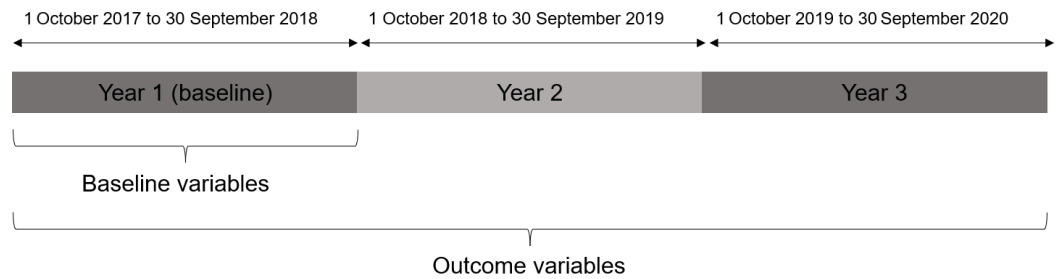

**Supplemental figure S2** Patient disposition. CGH, Changi General Hospital; COPD, chronic obstructive pulmonary disease; ED, emergency department.

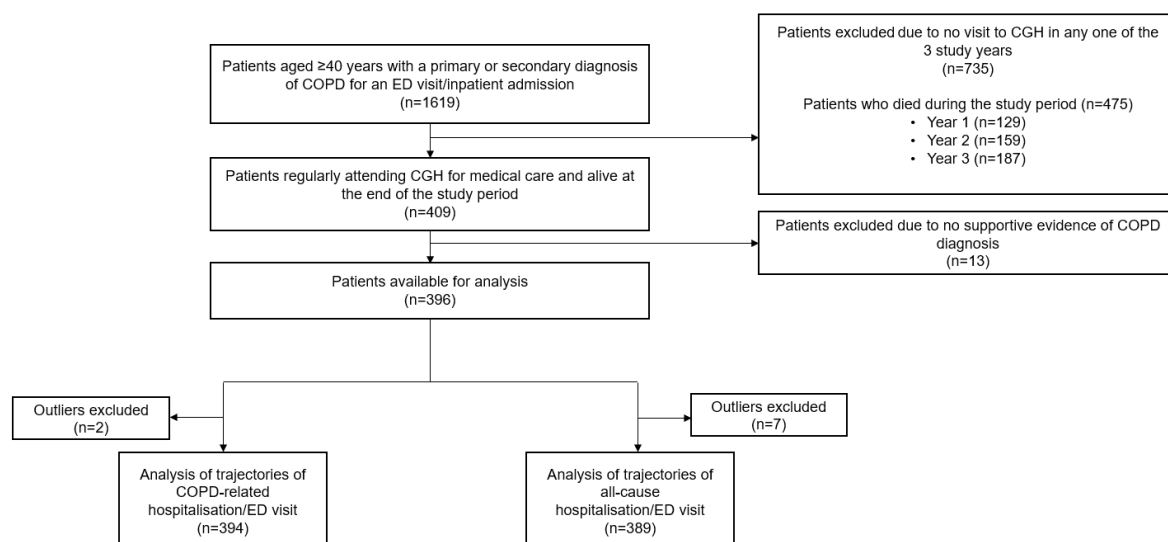

**Supplemental figure S3** Association between GOLD grade and likely trajectory.  
GOLD, Global Initiative for Chronic Obstructive Lung Disease.

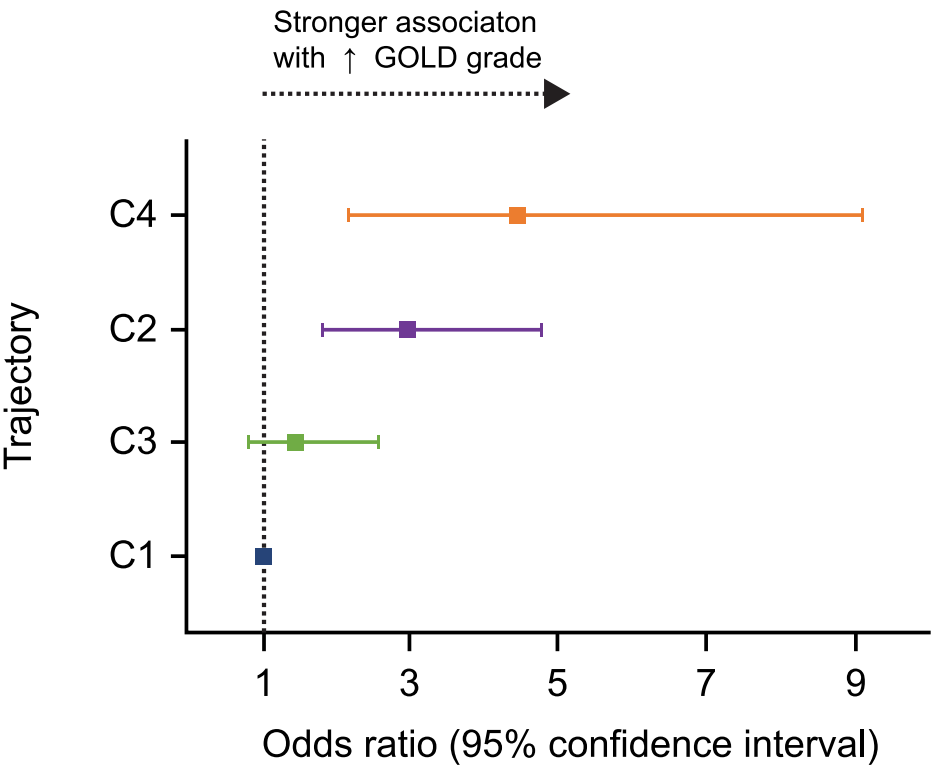

**Supplemental figure S4 (A–D)** Treatment regimen by trajectory for COPD-related hospitalisations/ED visits. ‘Others’ includes ICS monotherapy, ICS with SABA and ICS with LAMA. COPD, chronic obstructive pulmonary disease; ED, emergency department; ICS, inhaled corticosteroid; LABA, long-acting  $\beta_2$ -agonist; LAMA, long-acting muscarinic antagonist; SABA, short-acting  $\beta_2$ -agonist; SAMA, short-acting muscarinic antagonist.

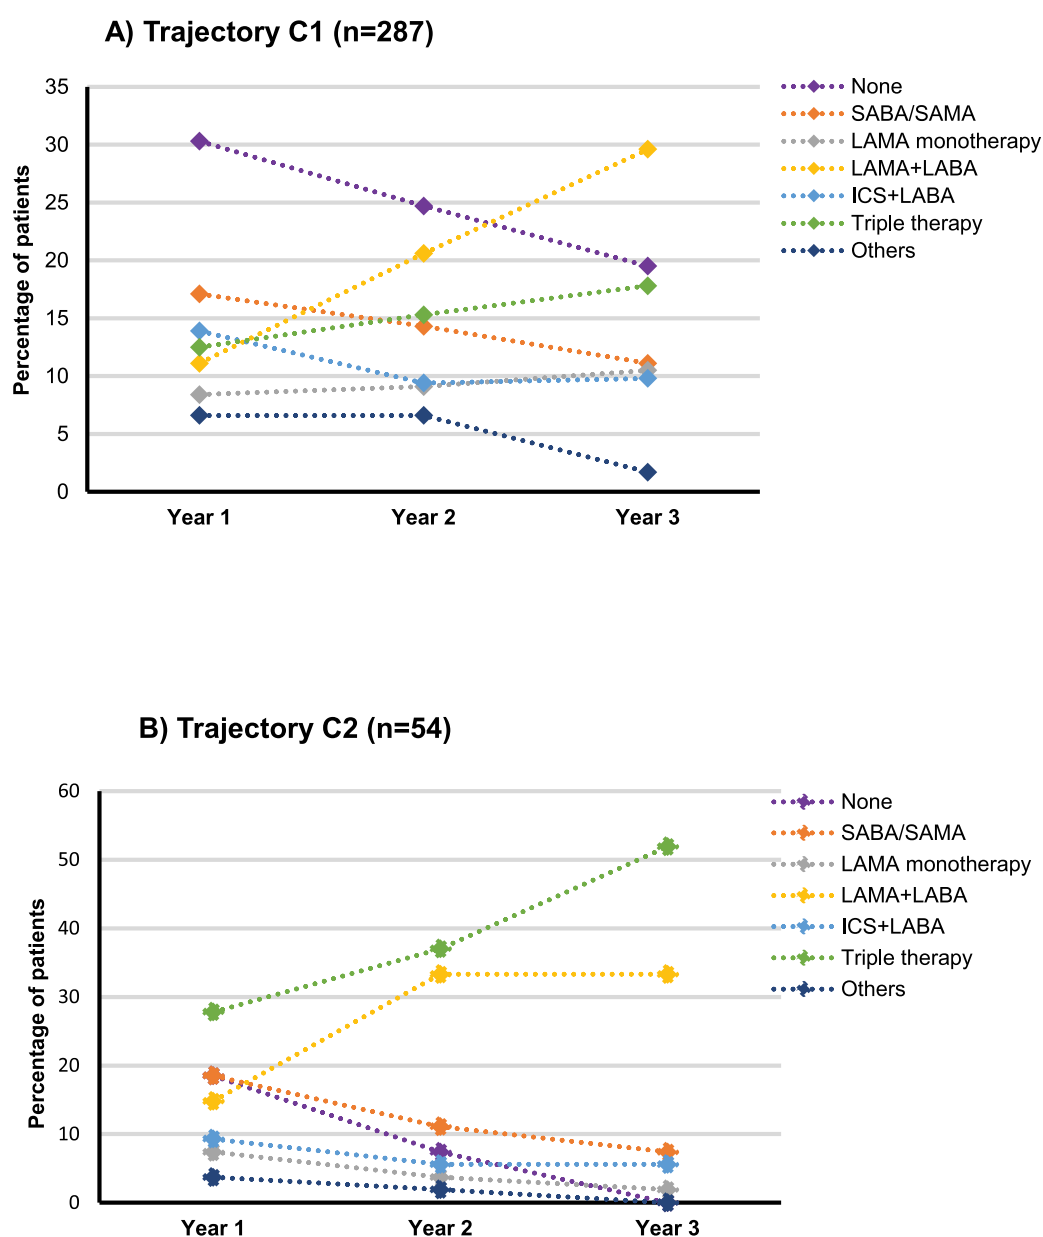

**C) Trajectory C3 (n=33)**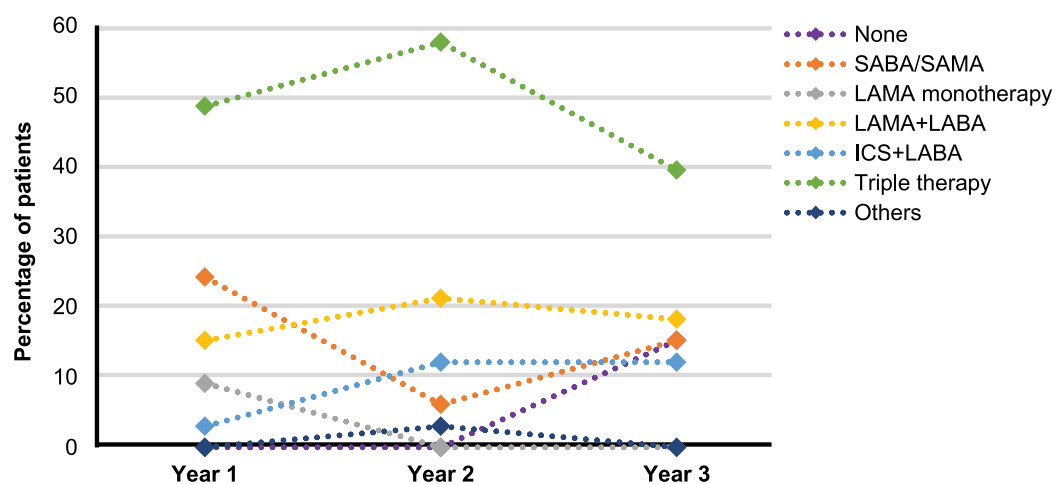**D) Trajectory C4 (n=20)**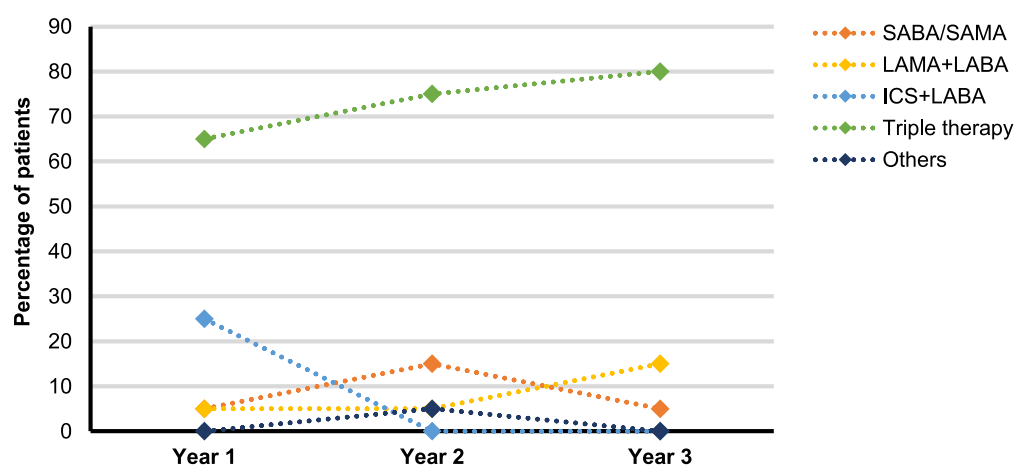

Supplement: bmjopen-2023-072571supp001_data_supplement.pdf [file bmjopen-2023-072571supp001_data_supplement.pdf]
